# Supplementary material for: Circulating vitamin D concentration and risk of seven cancers: Mendelian randomisation study
Source: PubMed Central journal article supplement (PMC5666592; doi:10.1136/bmj.j4761), 2017-10-31

**Appendix 2:** Forest plots of associations between each 25(OH)D-associated SNP and cancer risk (horizontal lines indicating 95% confidence intervals).

[posted as supplied by author]

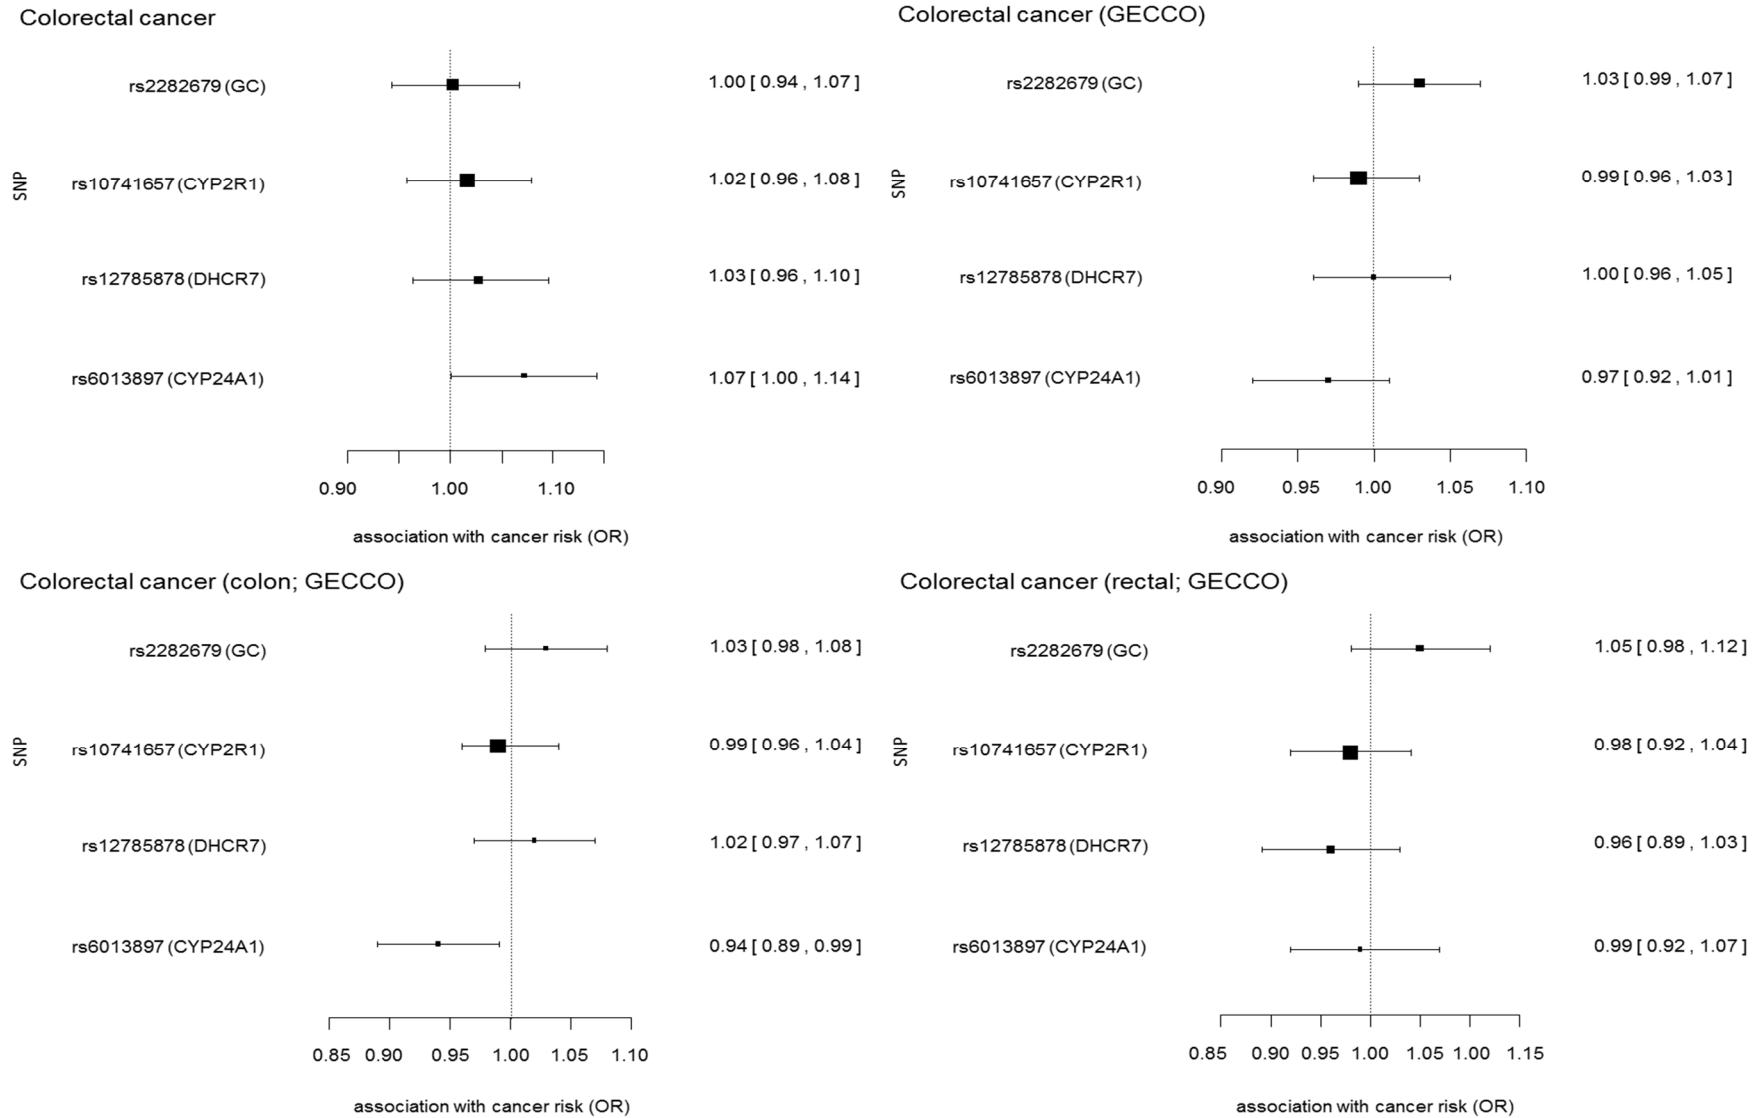

Colorectal cancer (women; GECCO)

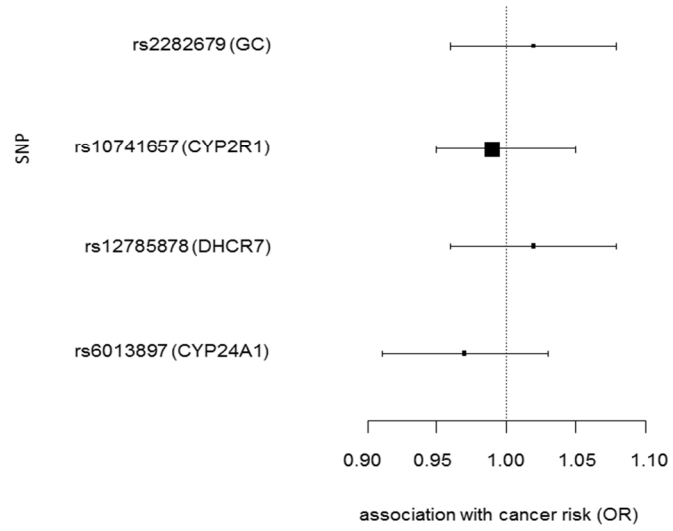

Colorectal cancer (men; GECCO)

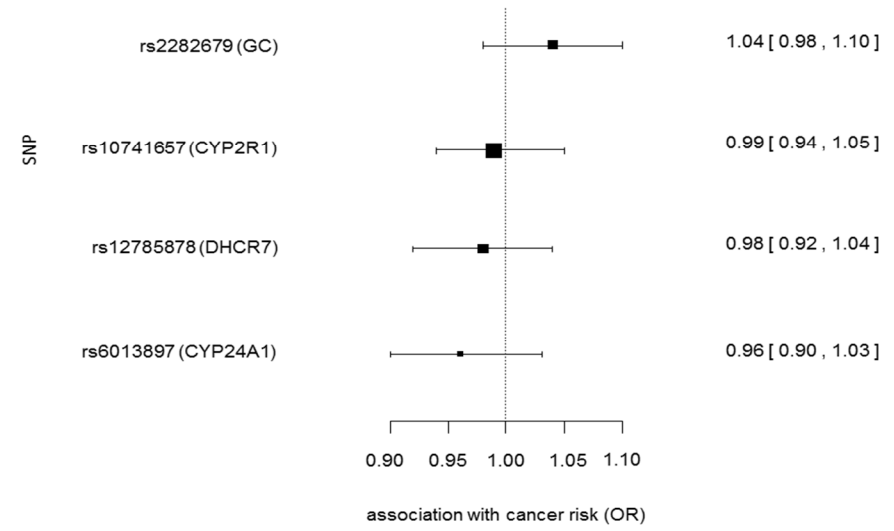

Colorectal cancer (distal; GECCO)

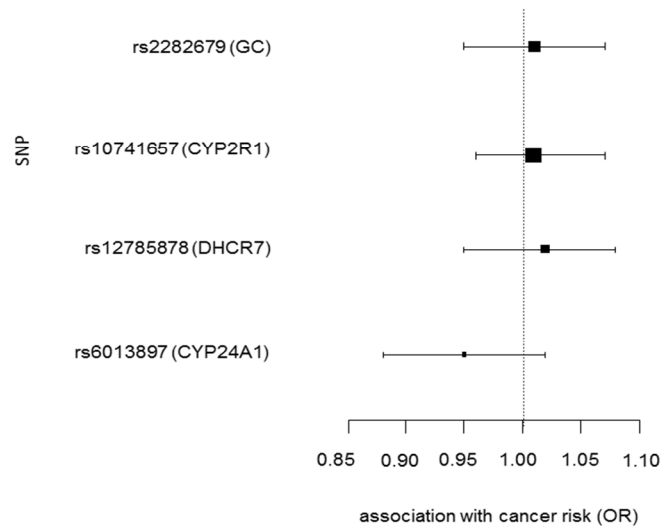

Colorectal cancer (proximal; GECCO)

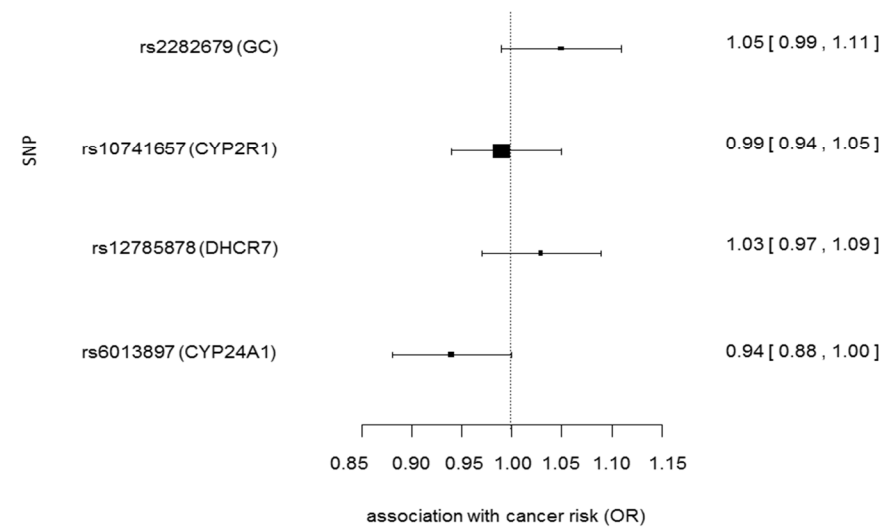

Breast cancer

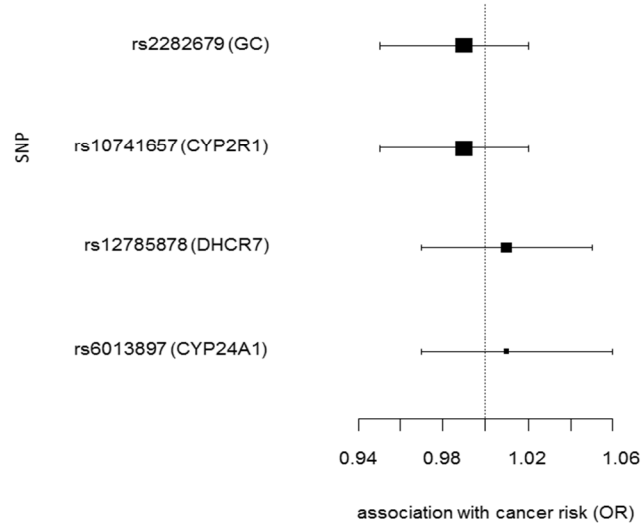

Breast cancer (ER negative)

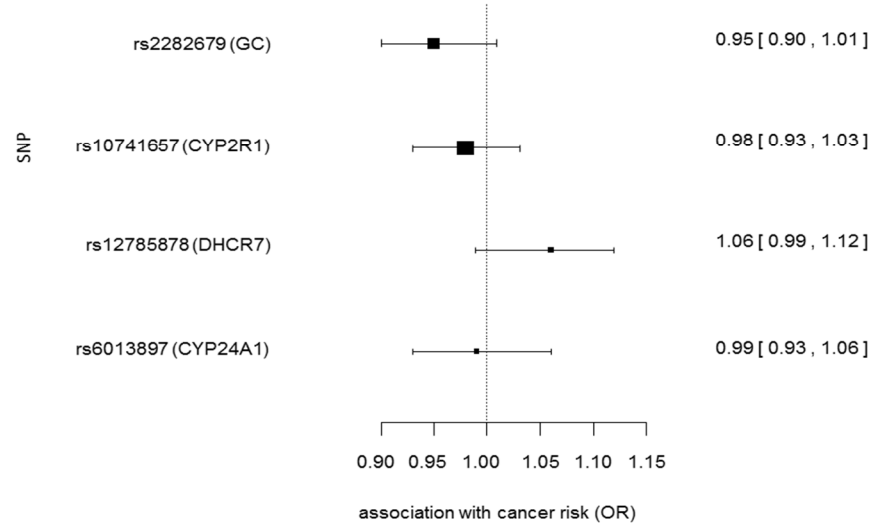

Prostate cancer (PRACTICAL)

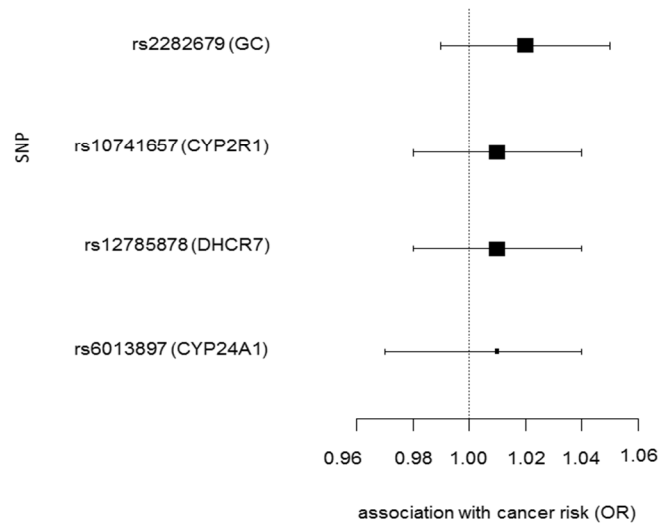

Prostate cancer (GAME-ON)

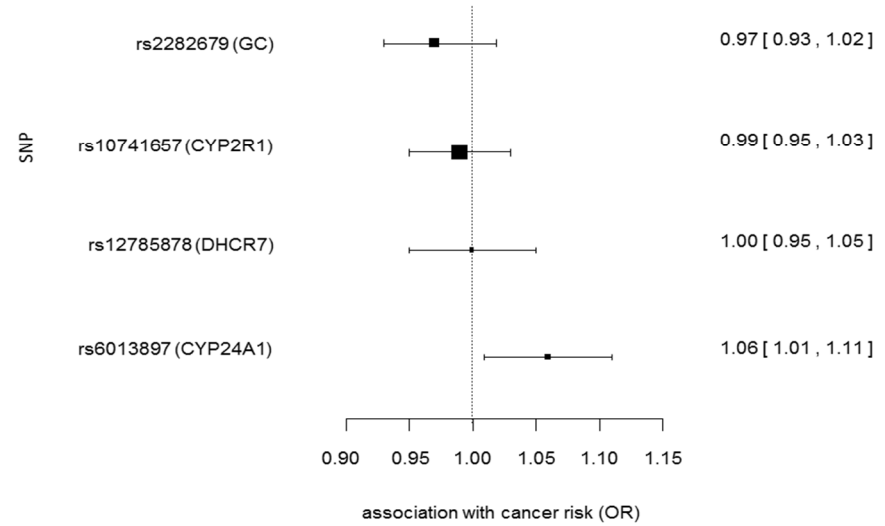

Prostate cancer (aggressive; GAME-ON)

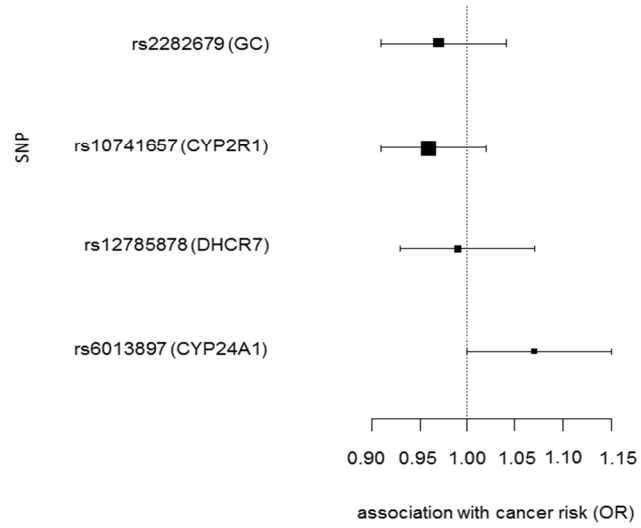

Ovarian cancer

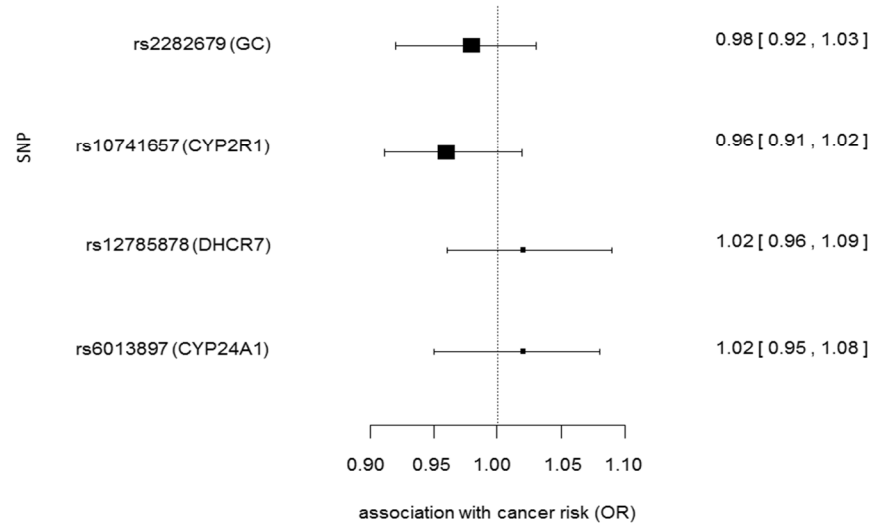

Ovarian cancer (clear-cell)

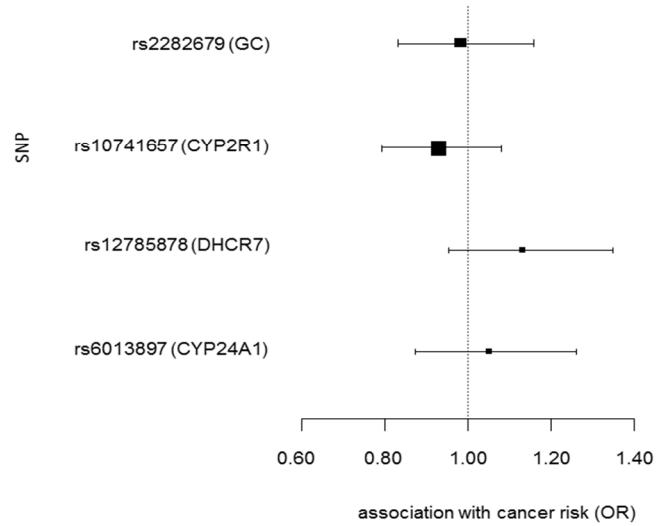

Ovarian cancer (endometrioid)

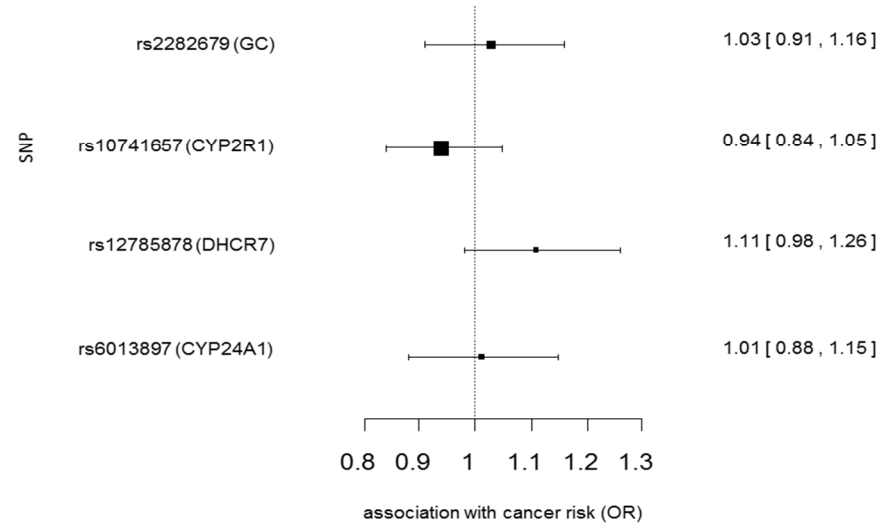

Ovarian cancer (serous)

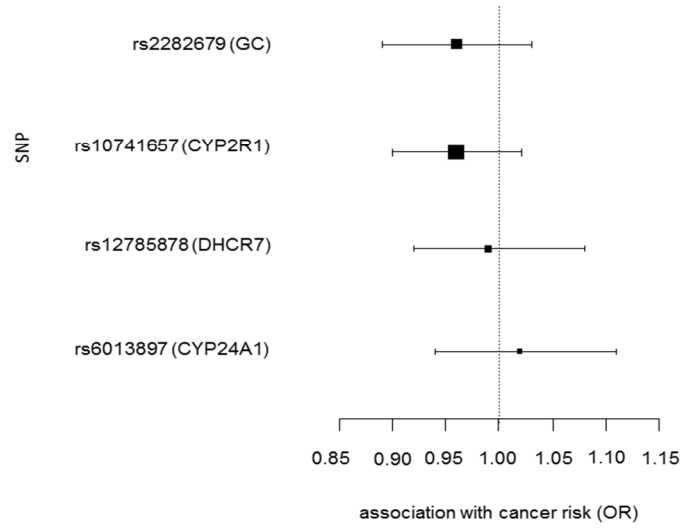

Lung cancer

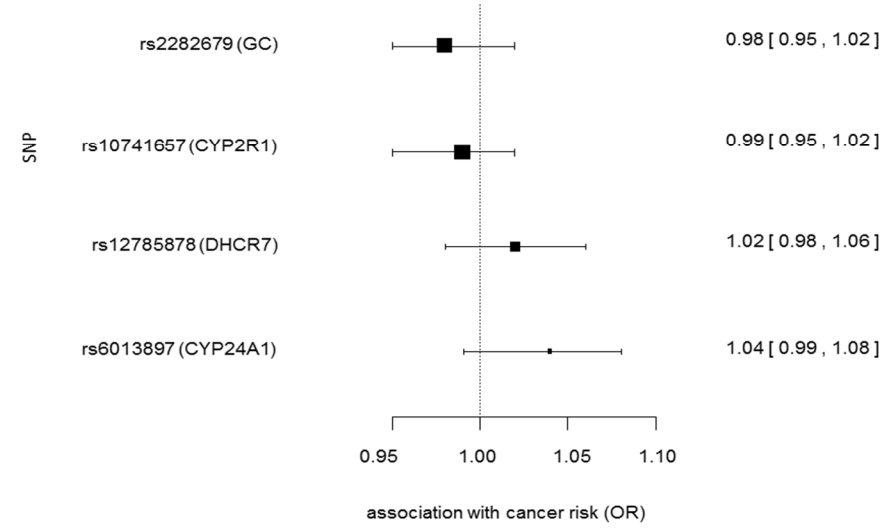

Lung cancer (adenocarcinoma)

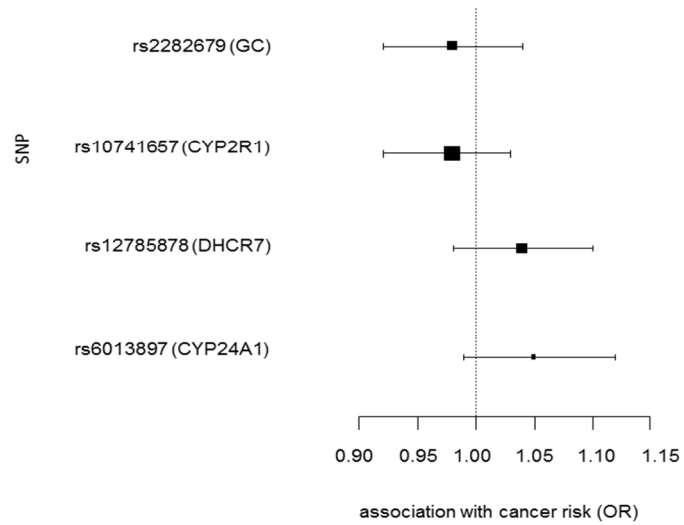

Lung cancer (squamous)

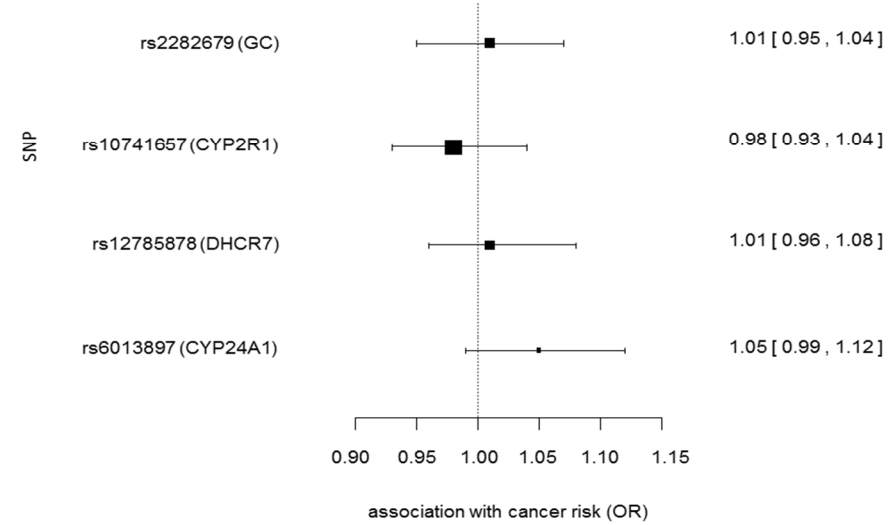

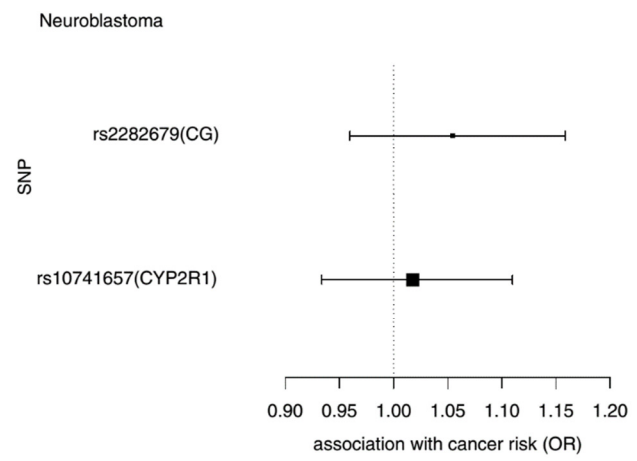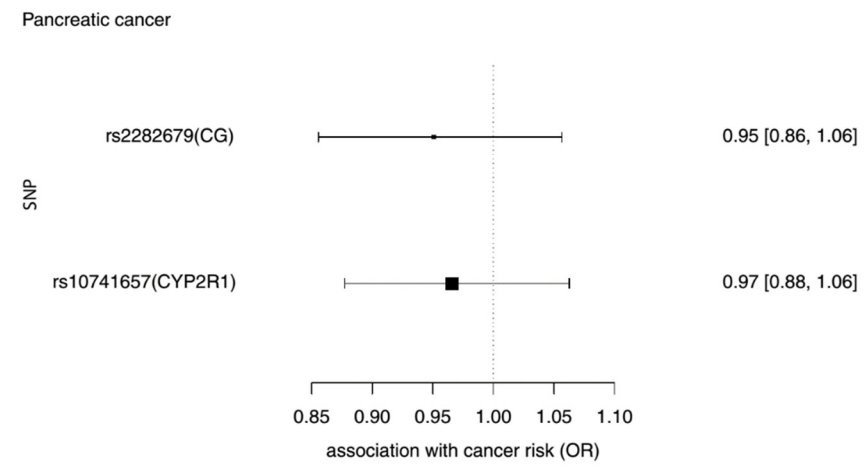

Supplement: dimv039614.ww2.pdf [file dimv039614.ww2.pdf]
